# Supplementary material for: Detection of Ligation Products of DNA Linkers with 5′-OH Ends by Denaturing PAGE Silver Stain
Source: PLoS One. 2012 Jun 27;7(6):e39251. doi: 10.1371/journal.pone.0039251 (PMC3384673; doi:10.1371/journal.pone.0039251)
Supplement: Supporting Information S3 — A protocol for MS analysis of T4 DNA ligase. This protocol describes the procedure of MS analysis of T4 DNA ligase (Fermentas). (DOC) [file pone.0039251.s003.doc]

**Supporting information S3**

**Procedures of MS analysis for T4 DNA ligase used**

MS analysis for T4 DNA ligase was performed as described below: 5 µl of T4 DNA ligase (Fermentas, 5U/μl) was reconstituted with 100 µl of 50 mM NH4HCO3 (pH 8.0). The sample was reduced by adding 10µl of 200 mM DTT / 50 mM NH4HCO3 (pH 8.0), at 56 oC for 1 hour, and then alkylated by adding 25µl of 200 mM Iodoacetamide / 50 mM NH4HCO3 (pH 8.0). The mixture was incubated for 1 hour at room temperature in dark. In order for the trypsin to work, 865µl of 50 mM NH4HCO3 (pH 8.0) were added to make the detergents and other chaotropes to be a compatible final concentration. Then added trypsin solution to a final ratio of 1:30 (w/w, trypsin: protein). Mixed gently by vortex and incubated at 37 oC for 16-20 hrs. Sample was desalted and concentrated by using Millipore ZipTip (µ-C18). The MALDI TOF/TOF samples were prepared by mixing one portion of protein digest sample with one portion of 5 mg/ml α-CHCA solution before spotting on the MALDI plate. MS and tandem mass spectrometry (MS/MS) data were acquired with the AB SCIE x 5800 MALDI TOF/TOF. For MS/MS spectra, the collision energy was 2 keV and CID off. The interpretation of both the MS and MS/MS data was carried out using the ProteinPilot software (AB SCIEX).
